# Supplementary material for: Preparation of tough and stiff ionogels via phase separation
Source: Royal Society of Chemistry journal article supplement (doi:10.1039/d3mh01587d), 2023-10-16
Supplement: d3mh01587d1.pdf [file d3mh01587d1.pdf]

## Supplementary Information

# A Tough and Stiff Ionogel Prepared by A Restricted Phase Separation Process

*Jinliang Xie<sup>1</sup>, Xiaoqian Li<sup>2</sup>, Zhongjie He<sup>1</sup>, Ling Fan<sup>3</sup>, Dongdong Yao<sup>\*1</sup>, Yaping Zheng<sup>\*1</sup>*

<sup>1</sup> School of Chemistry and Chemical Engineering, Northwestern Polytechnical University Xi'an, Shaanxi 710072, P. R. China, Telephone and fax numbers: +86-029-88431688;

<sup>2</sup>Department of Ultrasonic Medicine, Tang Du Hospital, Air Force Medical University, No.569 of Xin Si Road, Xi'an, Shaanxi 710038. P. R. China;

<sup>3</sup> Guangxi Key Laboratory of Chemistry and Engineering of Forest Products, Guangxi Minzu University, Nanning 530006, P. R. China;

\* Corresponding authors. E-mail: [zhengyp@nwpu.edu.cn](mailto:zhengyp@nwpu.edu.cn) (Yaping Zheng), [yaodd@nwpu.edu.cn](mailto:yaodd@nwpu.edu.cn) (Dongdong Yao).

### Table of Contents

#### 1. Supplementary Notes

#### 2. Supplementary Figures

Figure S1. The structure of the ILs.

Figure S2. The <sup>1</sup>H-NMR spectra of ILs.

Figure S3. The FT-IR spectra of five kinds of ionic liquids.

Figure S4. Viscosity performance of ionic liquids.

Figure S5. Optical photos of WPAM-IL and PAM-IL prepared with different ILs.

Figure S6. The XRD spectra of PAM<sub>x</sub>-IL([EBIM]Br) ionogels and [EBIM]Br ionic liquid.

Figure S7. Visible light transmittance spectra of ionogels.

Figure S8. The phase separation process of PAM<sub>x</sub>-IL([EBIM]Br) ionogels observed by optical microscope.

Figure S9. DSC curves of ionogels.

Figure S10. Structure models of PAM<sub>x</sub>-IL([EBIM]Br) ionogels based on MD calculation.

Figure S11. The SEM images of phase separation structure of PAM<sub>x</sub>-IL([EBIM]Br) ionogels.

Figure S12. Compressive stress-strain curves of PAM<sub>x</sub>-IL([EBIM]Br) ionogels.

Figure S13. The mechanical properties of WPAM-IL ionogels.

Figure S14. TGA and DTG curves of ionic liquids and PAM-IL ionogels.

Figure S15. Infrared thermal images of shape-memory performance of PAM-IL ionogels.

Figure S16. The mechanical properties of PAM40-IL([EBIM]Br) ionogel before and after recycling.

Figure S17. PDMS/PAM-IL/PDMS ultra-thin keyboard.

### **3. Supplementary Tables**

Table S1. The mechanical properties of WPAM<sub>x</sub>-IL([EBIM]Br) and PAM<sub>x</sub>-IL([EBIM]Br) ionogels.

Table S2. Various properties of PAM-IL ionogels.

Table S3. The mechanical properties of reported high strength gel materials.

### **4. Reference**

### Supplementary Note 1

The chemical structures of five ionic liquids were characterized by infrared-spectroscopy (Figure S2, Supplementary Information). The absorption peaks at 3279-3537  $\text{cm}^{-1}$ , 3062  $\text{cm}^{-1}$  and 1564  $\text{cm}^{-1}$  were attributed to the  $\nu(\text{-C-H})$ ,  $\nu(\text{-CH=CH-})$  and  $\nu(\text{-C=N-})$  on the imidazole ring of [EBIM] cations, respectively. The sharp absorption peaks at 1468  $\text{cm}^{-1}$  were attributed to the  $\nu(\text{-C-H})$  of methyl on the side chain of alkane, while the peak at 1690  $\text{cm}^{-1}$  were attributed to the  $\nu(\text{-C=O})$  of TFA anions and the peak at 1059  $\text{cm}^{-1}$  were attributed to the  $\nu(\text{B-F})$  of  $\text{BF}_4$  anions, respectively. Combined with the results of FT-IR and  $^1\text{H-NMR}$  (Supplementary Figure S1), it can be proved that all five ionic liquids have been successfully synthesized.

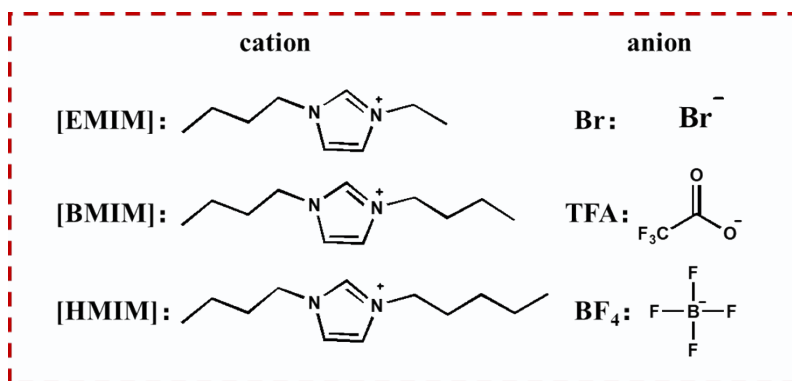

Figure S1. The cation and anion of ILs used in this work.

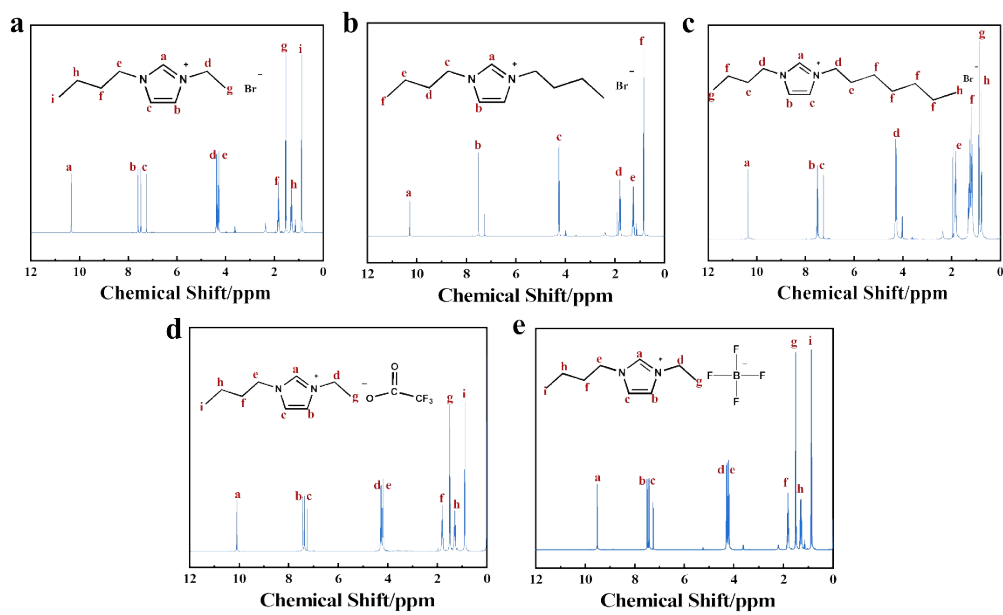

**Figure S2.** The  $^1\text{H-NMR}$  spectra of ILs, (a) [EBIM]Br, (b) [BBIM]Br, (c) [HBIM]Br, (d) [EBIM]TFA, and (e) [EBIM]BF<sub>4</sub>.

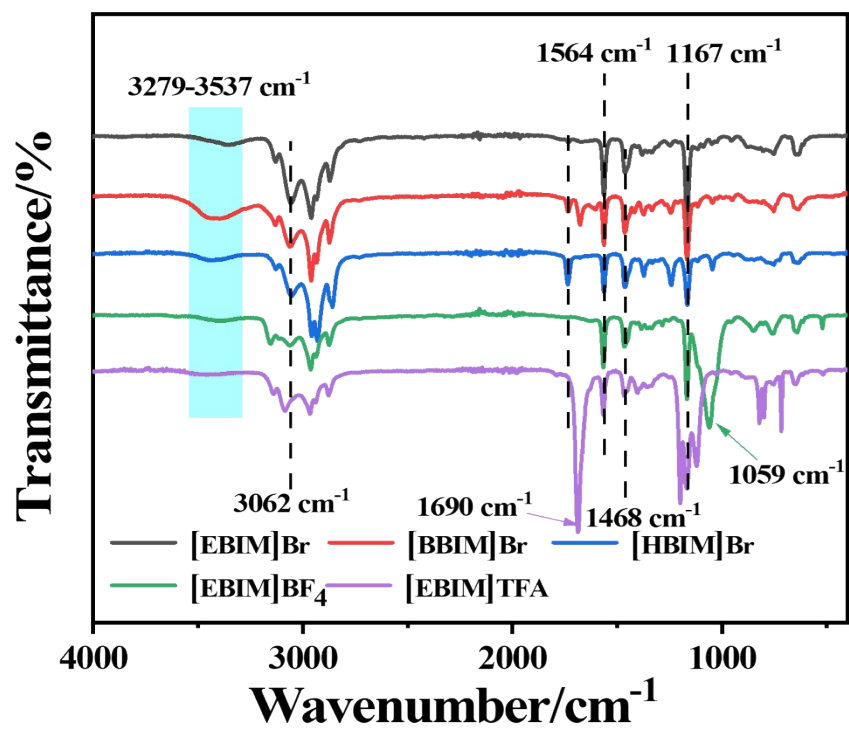

Figure S3. The FT-IR spectra of five kinds of ionic liquids.

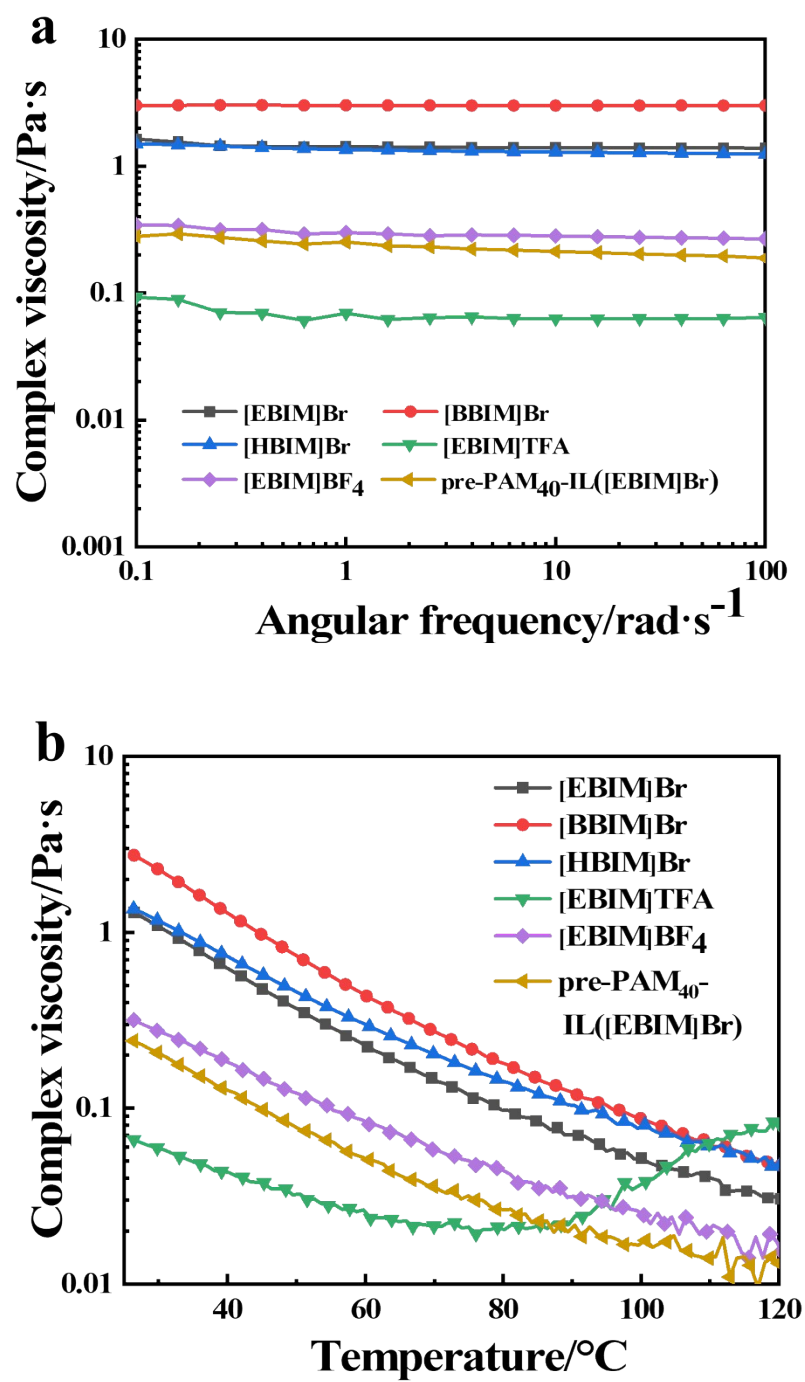

**Figure S4.** (a) The viscosity-frequency curves and (b) viscosity-temperature curves of five kinds of ionic liquids.

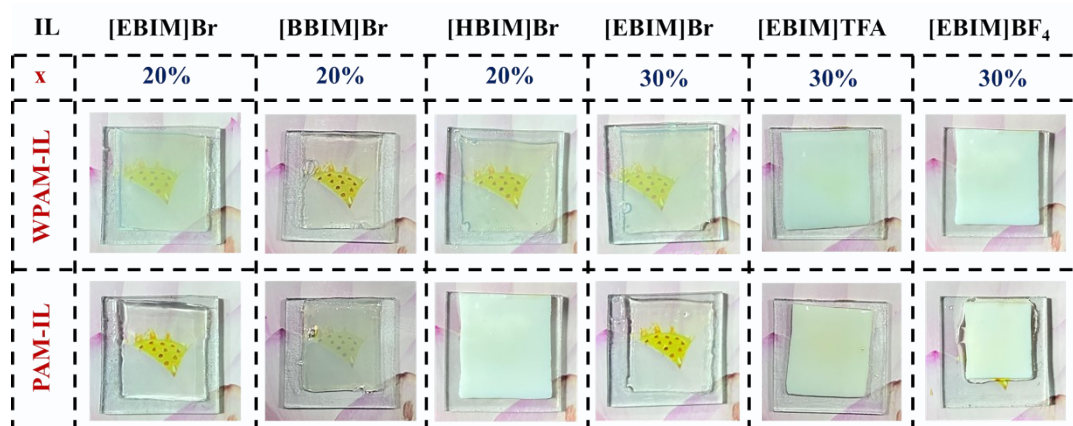

**Figure S5.** Optical photos of WPAM-IL and PAM-IL ionogels prepared with different ILs.



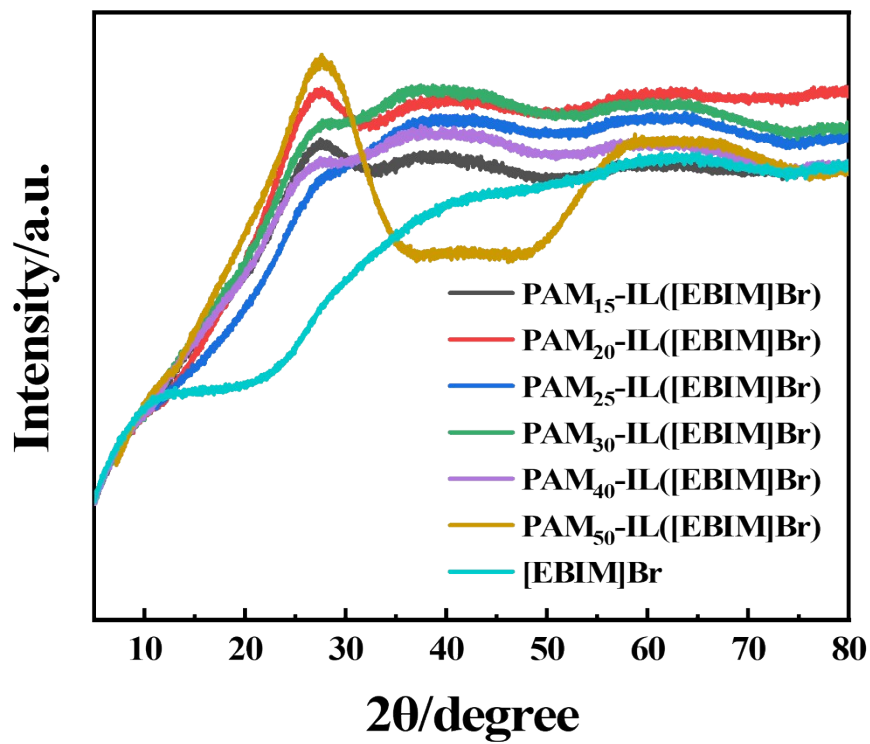

**Figure S6.** The XRD spectra of PAM<sub>x</sub>-IL([EBIM]Br) ionogels and [EBIM]Br ionic liquid.

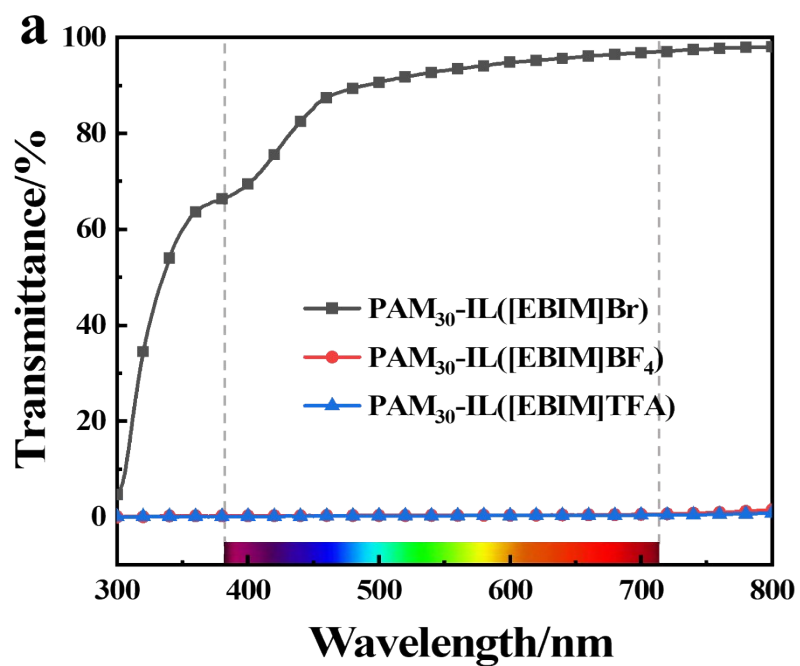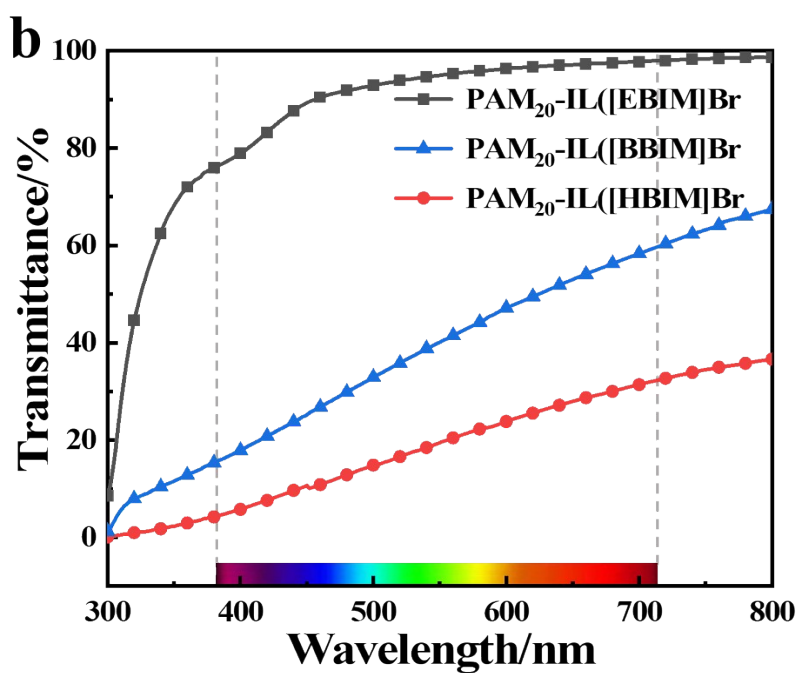

**Figure S7.** (a, b) Visible light transmittance spectra of (a) PAM<sub>30</sub>-IL(Y) ionogels, Y=[EBIM]Br, [EBIM]BF<sub>4</sub>, and [EBIM]TFA, (b) PAM<sub>20</sub>-IL(Y) ionogels, Y=[EBIM]Br, [BBIM]Br, and [HBIM]Br.

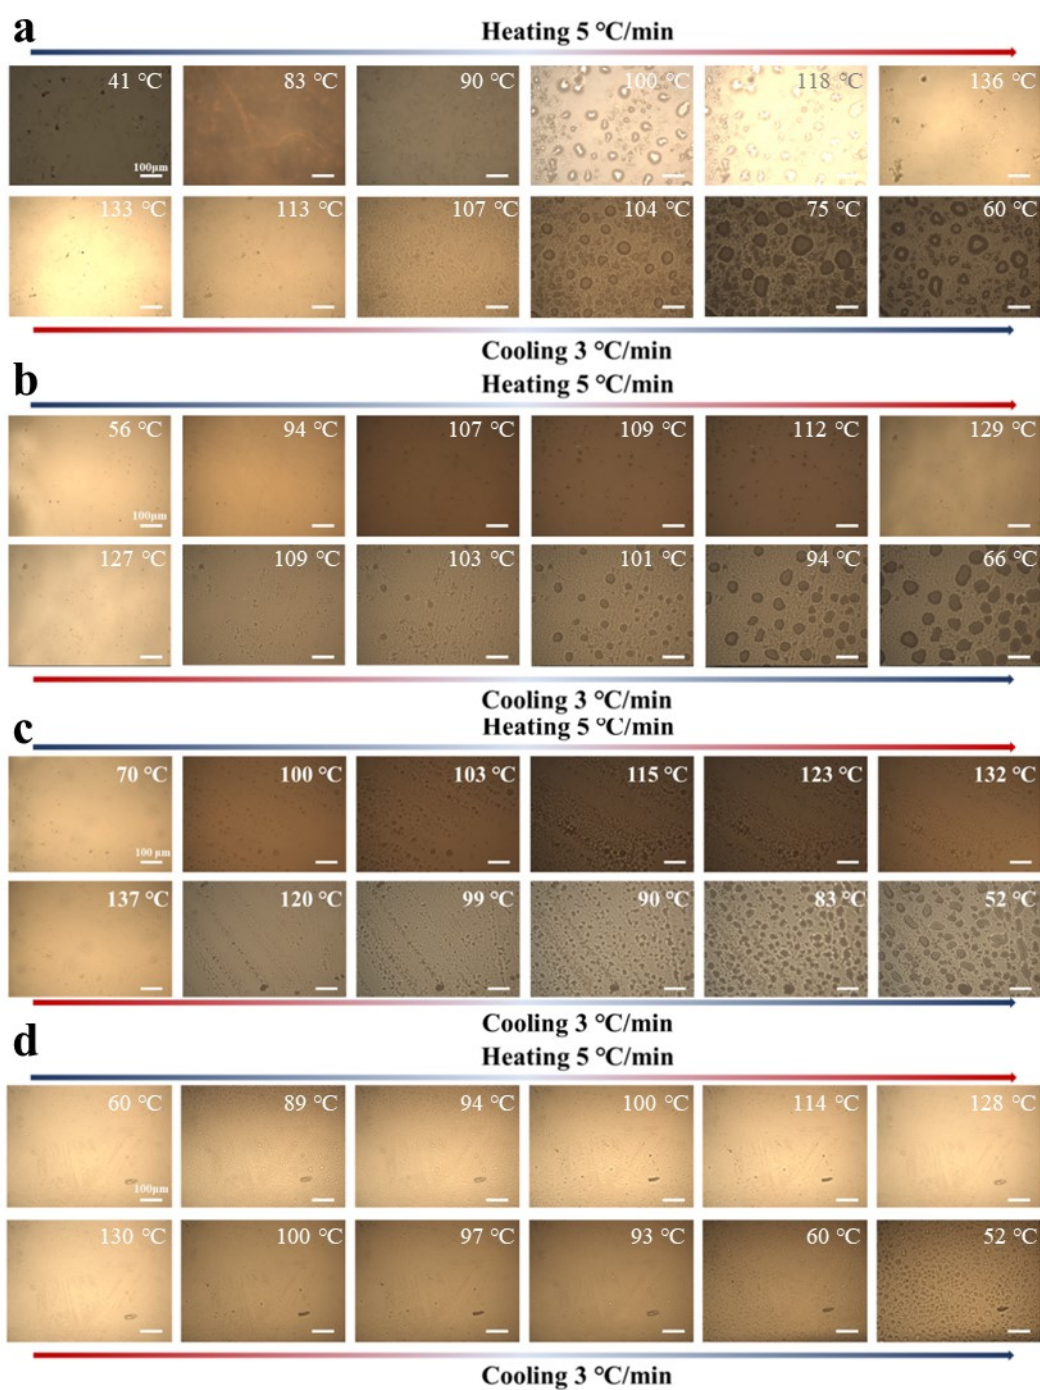

Figure S8. Phase separation process of (a) PAM<sub>30</sub>-IL([EBIM]Br) ionogel, (b) PAM<sub>35</sub>-IL([EBIM]Br) ionogel, (c) PAM<sub>40</sub>-IL([EBIM]Br) ionogel and (d) PAM<sub>50</sub>-IL([EBIM]Br) ionogel during temperature rise (from RT to 140 °C, 5°C/min) and fall (from 140°C to RT, 5°C/min) observed by optical microscope.

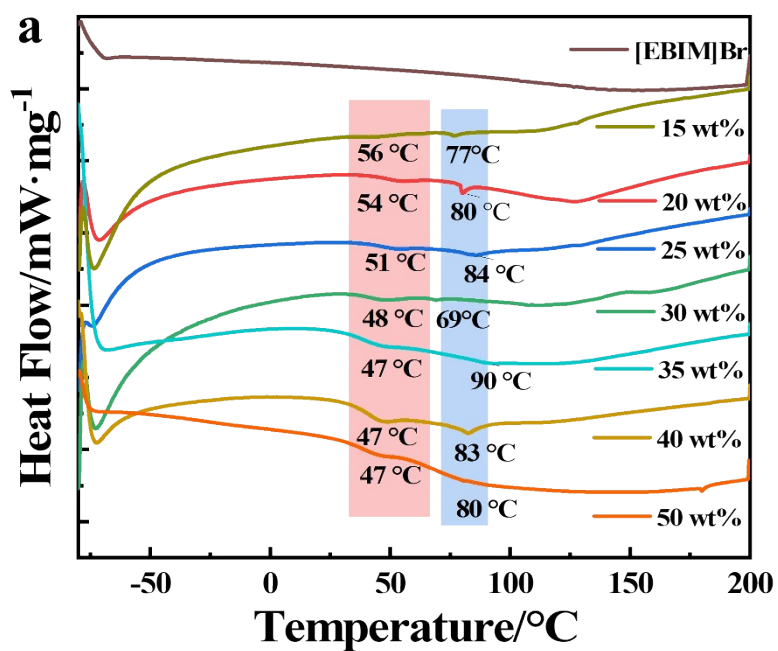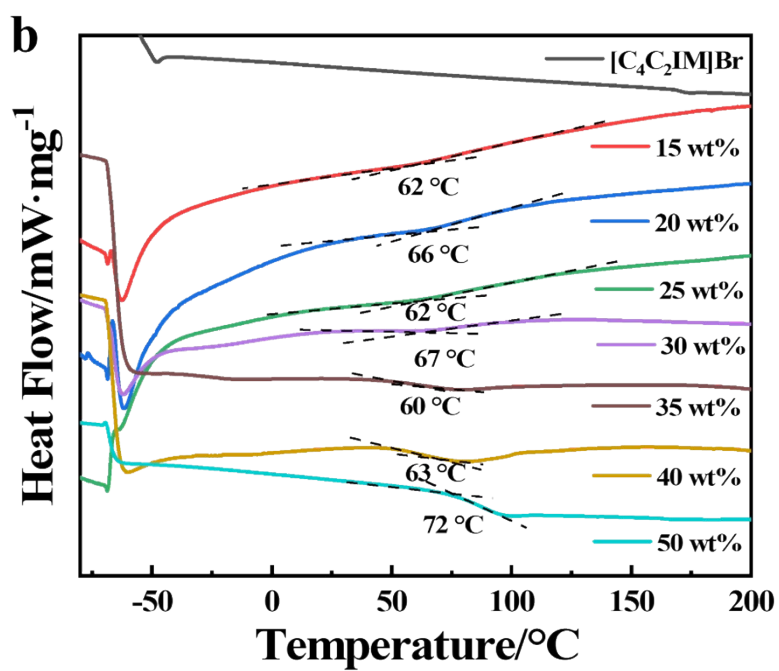

**Figure S9.** DSC curves of (a) PAM<sub>x</sub>-IL([EBIM]Br) ionogels, and (b) PAM<sub>x</sub>-IL([EBIM]Br) ionogels after a cycle of heating up and down, the cooling rate is 10K/min.

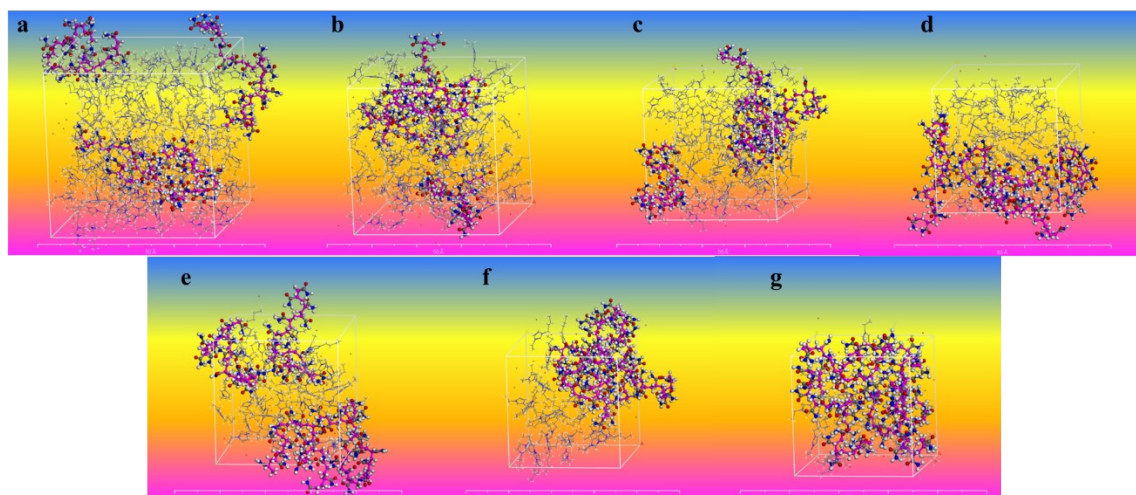

**Figure S10.** Structure models of  $\text{PAM}_x\text{-IL}([\text{EBIM}]\text{Br})$  ionogels with anneal and dynamic optimized based on MD calculation, (a)  $\text{PAM}_{15}\text{-IL}([\text{EBIM}]\text{Br})$  ionogel, (b)  $\text{PAM}_{20}\text{-IL}([\text{EBIM}]\text{Br})$  ionogel, (c)  $\text{PAM}_{25}\text{-IL}([\text{EBIM}]\text{Br})$  ionogel, (d)  $\text{PAM}_{30}\text{-IL}([\text{EBIM}]\text{Br})$  ionogel, (e)  $\text{PAM}_{35}\text{-IL}([\text{EBIM}]\text{Br})$  ionogel, (f)  $\text{PAM}_{40}\text{-IL}([\text{EBIM}]\text{Br})$  ionogel, (g)  $\text{PAM}_{50}\text{-IL}([\text{EBIM}]\text{Br})$  ionogel.

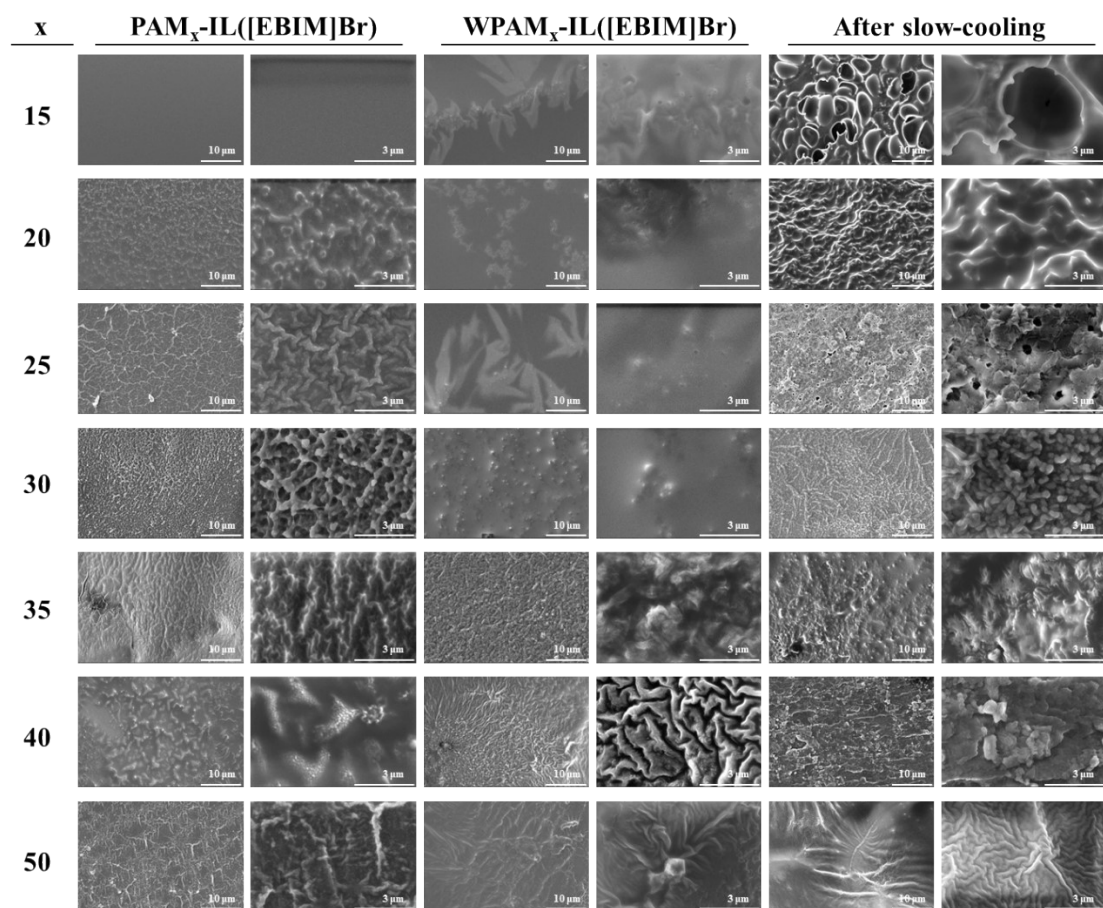

**Figure S11.** The SEM images of the phase separation structure of PAM<sub>x</sub>-IL([EBIM]Br) ionogels, WPAM<sub>x</sub>-IL([EBIM]Br) ionogels, and the corresponding ionogels obtained after slow cooling. The polymer content of the ionogels in each row is "x," where "x" represents the mass fraction of polymer (x=15, 20, 25, 30, 35, 40, or 50). The images on the right side of each column are magnifications of the corresponding images on the left side.



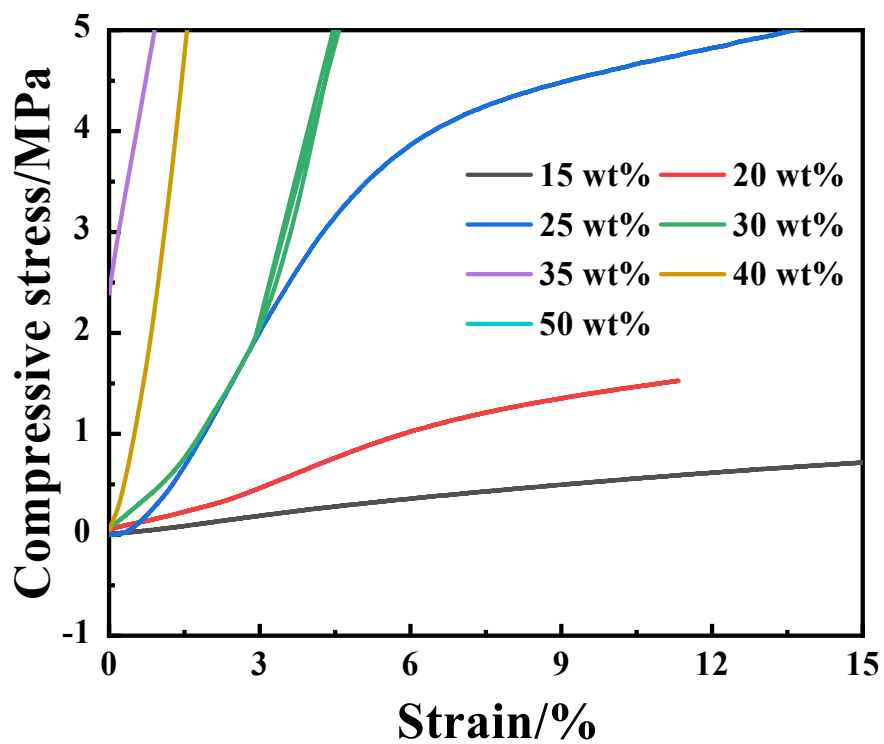

**Figure S12.** Compressive stress-strain curves of PAMx-IL([EBIM]Br) ionogels (magnification of the black dashed area in Figure 3c).

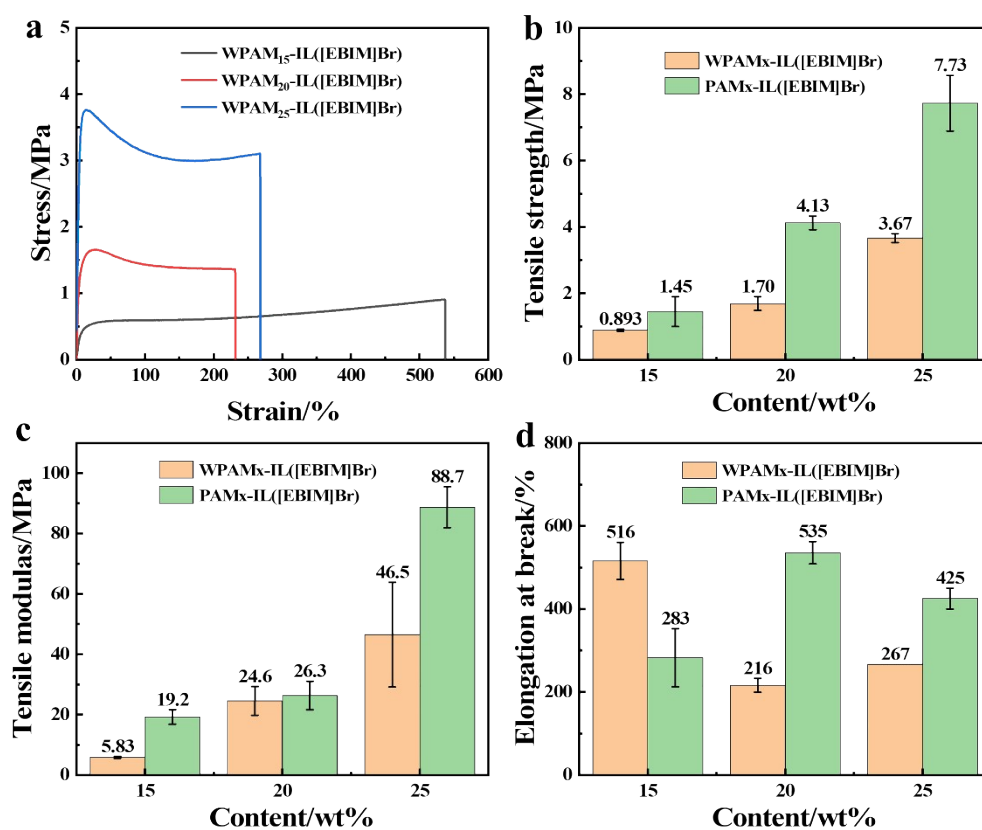

**Figure S13.** Mechanical properties of WPAM<sub>x</sub>-IL([EBIM]Br) ionogels. (a) Tensile stress-strain curves of WPAM<sub>x</sub>-IL([EBIM]Br). (b-d) A comparison between WPAM<sub>x</sub>-IL([EBIM]Br) and PAM<sub>x</sub>-IL([EBIM]Br) in relation to (b) tensile strength, (c) tensile modulus, and (d) elongation at break.  $x=15, 20$  and  $30$ . Error bars show standard deviation from three independent samples.



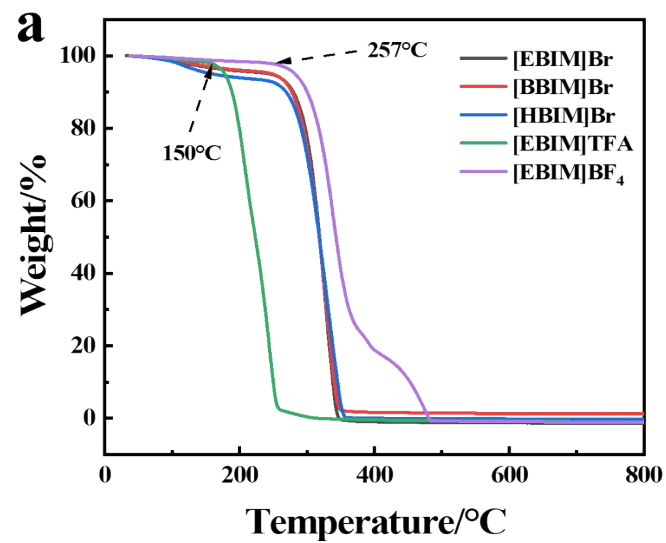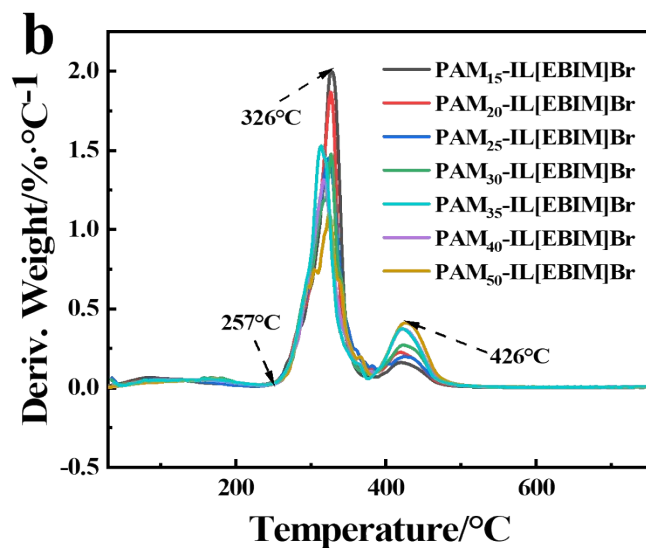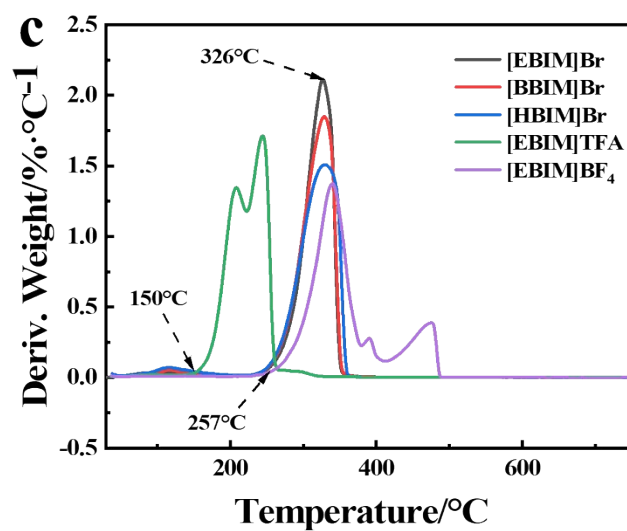

**Figure S14.** (a) TGA curves of ionic liquids, (b) DTG curves of PAM<sub>x</sub>-IL([EBIM]Br) ionogels, and (c) DTG curves of ionic liquids.

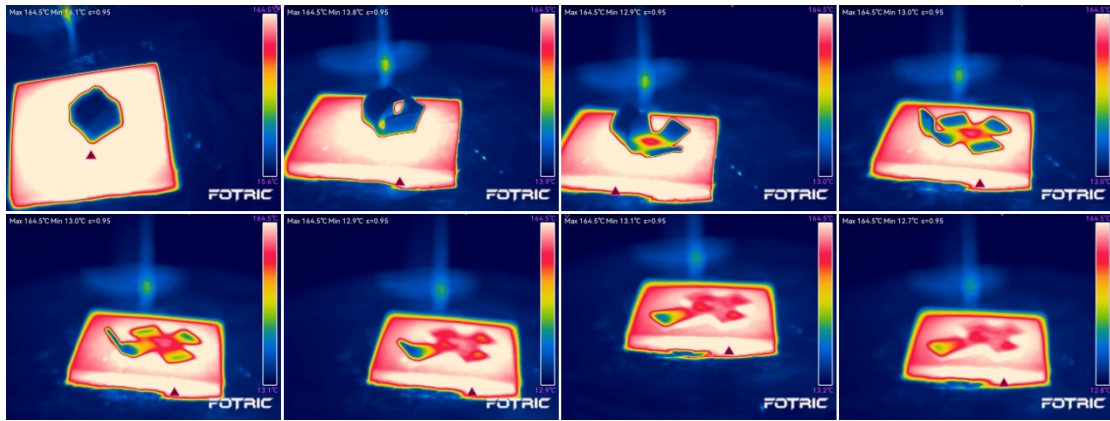

**Figure S15.** Infrared thermal imaging photos of thermally driven shape-memory behavior of PAM40-IL ionogel programmed as box shape.

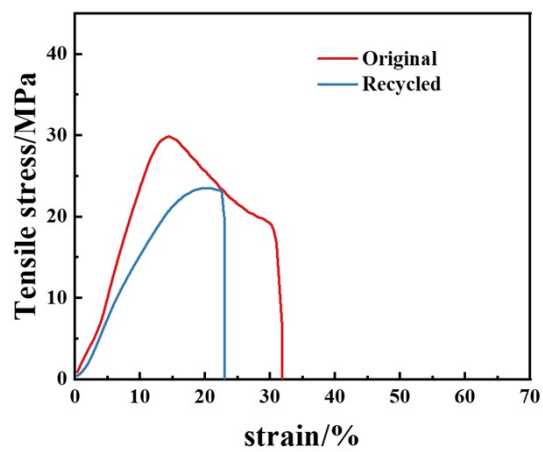

**Figure S16.** The mechanical properties of PAM<sub>40</sub>-IL([EBIM]Br) ionogel before and after recycling.

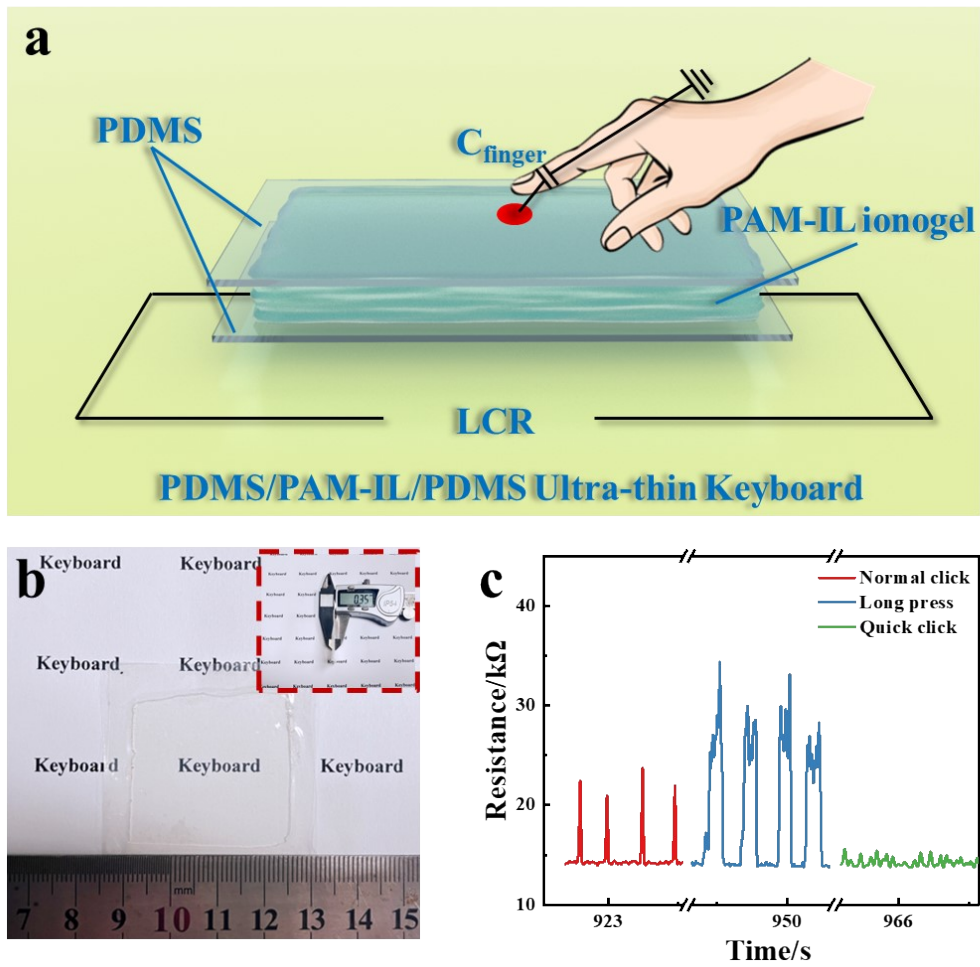

**Figure S17.** PDMS/PAM-IL/PDMS ultra-thin keyboard. (a) Schematic diagram, (b) Optical photograph, (c) Signal curves under different click modes.

**Table S1.** Performance summary of PAM<sub>x</sub>-IL(Y) ionogels.

| Ionogel                                       | Transmittance /% | Density /g·cm <sup>-3</sup> | Tensile strength /MPa                | Tensile modulus /MPa | Elongation at break /% | Tensile yield strength /MPa | Conductivity /S·cm <sup>-1</sup> | Compressive strength /MPa | Compressive modulus /MPa | Thermal decomposition temperature/°C |
|-----------------------------------------------|------------------|-----------------------------|--------------------------------------|----------------------|------------------------|-----------------------------|----------------------------------|---------------------------|--------------------------|--------------------------------------|
| PAM <sub>15</sub> -IL([EBIM]Br)               | 94.0             | 1.267                       | 1.45                                 | 19.2                 | 283                    | 1.08                        | 0.875                            | 0.30                      | 7.0                      | 257                                  |
| PAM <sub>20</sub> -IL([EBIM]Br)               | 98.6             | 1.273                       | 4.13                                 | 26.3                 | 535                    | 1.66                        | 0.920                            | 0.95                      | 17.1                     | 257                                  |
| PAM <sub>25</sub> -IL([EBIM]Br)               | 95.7             | 1.271                       | 7.73                                 | 88.7                 | 425                    | 4.70                        | 0.542                            | 3.9                       | 85.3                     | 257                                  |
| PAM <sub>30</sub> -IL([EBIM]Br)               | 98.0             | 1.282                       | 10.4                                 | 143.18               | 386.7                  | 8.45                        | 0.849                            | 10.1                      | 201.1                    | 257                                  |
| PAM <sub>35</sub> -IL([EBIM]Br)               | 91.8             | 1.290                       | 19.1                                 | 251.6                | 229                    | 19.5                        | 0.036                            | 17.1                      | 334.2                    | 257                                  |
| PAM <sub>40</sub> -IL([EBIM]Br)               | 92.2             | 1.300                       | 31.1                                 | 319.80               | 30.2                   | 29.8                        | 0.042                            | 36.6                      | 683.3                    | 257                                  |
| PAM <sub>50</sub> -IL([EBIM]Br)               | 96.7             | 1.308                       | Too hard and brittle to test         |                      |                        |                             | 0.023                            | 112.2                     | 1771.8                   | 257                                  |
| PAM <sub>20</sub> -IL([BBIM]Br)               | 66.6             | 1.209                       | Too brittle to test                  |                      |                        |                             |                                  |                           |                          |                                      |
| PAM <sub>20</sub> -IL([HBIM]Br)               | 36.3             | 1.164                       | Too brittle to test                  |                      |                        |                             |                                  |                           |                          |                                      |
| PAM <sub>50</sub> -IL([EBIM]BF <sub>4</sub> ) | 1.39             | 1.255                       | Obvious leakage, too brittle to test |                      |                        |                             |                                  |                           |                          |                                      |
| PAM <sub>50</sub> -IL([EBIM]TFA)              | 0.76             | 1.254                       | Obvious leakage, too brittle to test |                      |                        |                             |                                  |                           |                          |                                      |

**Table S2.** The mechanical properties of WPAM<sub>x</sub>-IL([EBIM]Br) and PAM<sub>x</sub>-IL([EBIM]Br) ionogels.

| <b>Ionogel</b>                   | <b>Tensile strength/MPa</b> | <b>Tensile modulus/MPa</b> | <b>Elongation at break/%</b> | <b>tensile Yield strength/MPa</b> |
|----------------------------------|-----------------------------|----------------------------|------------------------------|-----------------------------------|
| PAM <sub>15</sub> -IL([EBIM]Br)  | 1.45                        | 19.2                       | 283                          | 1.08                              |
| PAM <sub>20</sub> -IL([EBIM]Br)  | 4.13                        | 26.3                       | 535                          | 1.66                              |
| PAM <sub>25</sub> -IL([EBIM]Br)  | 7.73                        | 88.7                       | 425                          | 4.70                              |
| WPAM <sub>15</sub> -IL([EBIM]Br) | 0.91                        | 5.83                       | 536                          | 0.51                              |
| WPAM <sub>20</sub> -IL([EBIM]Br) | 1.65                        | 24.6                       | 231                          | 1.65                              |
| WPAM <sub>25</sub> -IL([EBIM]Br) | 3.76                        | 46.5                       | 267                          | 3.76                              |

**Table S3.** The mechanical properties of reported high strength gel materials.

| No.              | Strength/MPa | Modulus/MPa   | Toughness/MJ·m <sup>-3</sup> | Type                                    |
|------------------|--------------|---------------|------------------------------|-----------------------------------------|
| 1                | 3.64         | 0.46          | 27.60                        | Hydrogel <sup>1</sup>                   |
| 2                | 5.60         | 1.30          | --                           | Hydrogel <sup>2</sup>                   |
| 3                | 3.10         | 0.60          | 8.65                         | Hydrogel <sup>3</sup>                   |
| 4                | 1.36         | 0.49          | --                           | Hydrogel <sup>4</sup>                   |
| 5                | 2.00         | --            | 22.00                        | Hydrogel <sup>5</sup>                   |
| 6                | 2.70         | 1.17          | 10.80                        | Hydrogel <sup>6</sup>                   |
| 7                | 2.20         | 0.27          | --                           | Hydrogel <sup>7</sup>                   |
| 8                | 2.70         | 0.82          | 8.50                         | Hydrogel <sup>8</sup>                   |
| 9                | 9.30         | 277.00        | 0.40                         | Hydrogel <sup>9</sup>                   |
| 10               | 20.20        | 16.10         | 62.70                        | DES gel <sup>10</sup>                   |
| 11               | 5.19         | 0.20          | --                           | PU-IL ionogel <sup>11</sup>             |
| 12               | 2.52         | 1.43          | 2.55                         | PU-IL ionogel <sup>12</sup>             |
| 13               | 22.00        | --            | 109.80                       | PU-IL ionogel <sup>13</sup>             |
| 14               | 4.99         | 1.71          | --                           | PU-IL ionogel <sup>14</sup>             |
| 15               | 9.15         | 1.12          | 178.46                       | BC ionogel <sup>15</sup>                |
| 16               | 300.00       | 5000.00       | 16.00                        | BC ionogel <sup>16</sup>                |
| 17               | 3.70         | 2.46          | 6.25                         | Organic-inorganic ionogel <sup>17</sup> |
| 18               | 0.23         | 0.04          | --                           | PILs ionogel <sup>18</sup>              |
| 19               | 2.28         | 2.28          | --                           | PILs ionogel <sup>19</sup>              |
| 20               | 15.00        | 82.81         | --                           | PILs ionogel <sup>20</sup>              |
| 21               | 12.60        | 46.50         | --                           | P(AA-co-AM) ionogel <sup>21</sup>       |
| 22               | 7.12         | 0.94          | --                           | P(IBA-co-MEA) ionogel <sup>22</sup>     |
| 23               | 0.37         | 0.42          | 21.80                        | PAA/CNF ionogel <sup>23</sup>           |
| 24               | 14.30        | 55.00         | 78.00                        | PDMAA ionogel <sup>24</sup>             |
| 25               | 0.90         | 15.60         | 2.48                         | PSHM ionogel <sup>25</sup>              |
| 26               | 4.80         | 0.48          | --                           | PEA ionogel <sup>26</sup>               |
| 27               | 7.60         | 58.00         | 25.00                        | PDMAA/MOF ionogel <sup>27</sup>         |
| <b>This work</b> | <b>31.10</b> | <b>319.80</b> | <b>32.90</b>                 | <b>PAM-IL ionogel</b>                   |

## Reference

1. N. Yuan, L. Xu, H. Wang, Y. Fu, Z. Zhang, L. Liu, C. Wang, J. Zhao and J. Rong, *ACS Appl. Mater. Inter.*, 2016, 8, 34034.
2. Y. Yang, X. Wang, F. Yang, L. Wang and D. Wu, *Adv. Mater.*, 2018, 30, 1707071.
3. S. X. Pan, M. Xia, H. H. Li, X. L. Jiang, P. X. He, Z. G. Sun and Y. H. Zhang, *J. Mater. Chem. C*, 2020, 8, 2827.
4. S. H. Li, H. Y. Pan, Y. T. Wang and J. Q. Sun, *J. Mater. Chem. A*, 2020, 8, 3667.
5. T. Nakajima, Y. Fukuda, T. Kurokawa, T. Sakai, U. I. Chung and J. P. Gong, *ACS Macro Lett.*, 2013, 2, 518.
6. L. J. Zhou, X. J. Pei, K. Fang, R. Zhang and J. Fu, *Polymer*, 2020, 192, 122319.
7. J. Wen, X. Zhang, M. Pan, J. Yuan, Z. Jia and L. Zhu, *Polymers*, 2020, 12, 239.
8. Y. Zhang, M. Y. Li, X. Han, Z. W. Fan, H. H. Zhang and Q. L. Li, *Chem. Phys. Lett.*, 2021, 769, 138437.
9. H. P. Yu and Y. J. Zhu, *Nano Research*, 2021, 14, 3643.
10. H. Zhang, N. Tang, X. Yu, M. H. Li and J. Hu, *Adv. Funct. Mater.*, 2022, 32, 2206305.
11. M. W. Zhang, R. Yu, X. L. Tao, Y. Y. He, X. P. Li, F. Tian, X. Y. Chen and W. Huang, *Adv. Funct. Mater.*, 2022, 33, 2208083.
12. T. Li, Y. Wang, S. Li, X. Liu and J. Sun, *Adv. Mater.*, 2020, 32, 2002706.
13. P. Liu, D. F. Pei, Y. P. Wu, M. J. Li, X. H. Zhao and C. X. Li, *J. Mater. Chem. A*, 2022, 10, 25602.
14. H. Wang, J. Xu, K. Li, Y. Dong, Z. Du and S. Wang, *J. Mater. Chem. B*, 2022, 10, 1301.
15. G. D. Fan, K. K. Liu, H. Su, Y. Q. Luo, Y. Geng, L. Y. Chen, B. J. Wang, Z. P. Mao, X. F. Sui and X. L. Feng, *Chem. Eng. J.*, 2022, 434, 134702.
16. W. Choi, A. Abraham, J. Ko, J. G. Son, J. Cho, B. I. Sang and B. Yeom, *ACS Appl. Mater. Inter.*, 2022, 14, 30056.
17. L. Yu, S. Guo, Y. Lu, Y. Li, X. Lan, D. Wu, R. Li, S. Wu and X. Hu, *Adv. Energy Mater.*, 2019, 9, 1900257.
18. Y. Zhao, D. L. Gan, L. C. Wang, S. Y. Wang, W. J. Wang, Q. Wang, J. J. Shao and X. C. Dong, *Adv. Mater. Tech.*, 2023, 8, 2201566.
19. Z. Yu and P. Wu, *Adv. Mater.*, 2021, 33, 2008479.
20. M. Wang, P. Zhang, M. Shamsi, J. L. Thelen, W. Qian, V. K. Truong, J. Ma, J. Hu and M. D. Dickey, *Nat. Mater.*, 2022, 21, 359.
21. B. Yiming, Y. Han, Z. Han, X. Zhang, Y. Li, W. Lian, M. Zhang, J. Yin, T. Sun, Z. Wu, T. Li, J. Fu, Z. Jia and S. Qu, *Adv. Mater.*, 2021, 33, 2006111.
22. Y. H. Ye, H. Oguzlu, J. Y. Zhu, P. H. Zhu, P. Yang, Y. L. Zhu, Z. M. Wan, O. J. Rojas and F. Jiang, *Adv. Funct. Mater.*, 2023, 33, 2209787.
23. L. Li, W. Li, X. Wang, X. Zou, S. Zheng, Z. Liu, Q. Li, Q. Xia and F. Yan, *Angew. Chem. Int. Ed. Engl.*, 2022, 61, 202212512.
24. K. G. Cho, S. An, D. H. Cho, J. H. Kim, J. Nam, M. Kim and K. H. Lee, *Adv. Funct. Mater.*, 2021, 31, 2102386.
25. Z. Q. Cao, H. L. Liu and L. Jiang, *Mater. Horiz.*, 2020, 7, 912.
26. Q. Xia, W. Li, X. Zou, S. Zheng, Z. Liu, L. Li, F. Yan, *Mater. Horiz.*, 2022, 9, 2881.
